# Supplementary material for: Structural basis for the formation of soy protein nanofibrils
Source: Royal Society of Chemistry journal article supplement (doi:10.1039/c8ra10610j), 2019-01-01
Supplement: c8ra10610j1.pdf [file c8ra10610j1.pdf]

## Supporting Information

### Structural basis for the formation of soy protein nanofibrils

*Leila Josefsson, Melker Cronhamn, Malin Ekman, Hugo Widehammar, Åsa Emmer,  
Christofer Lendel*

Department of Chemistry, KTH Royal Institute of Technology, Stockholm, Sweden.

**Table S1.** List of the chosen parent ions for MS/MS analysis from the spectra shown in Fig. S2 for HCCA and DBH matrices, respectively.

| <b>HCCA</b> |                  |            |                   |             |
|-------------|------------------|------------|-------------------|-------------|
| <b>m/z</b>  | <b>Intensity</b> | <b>S/N</b> | <b>Resolution</b> | <b>Area</b> |
| 1777.073    | 23248.041        | 94.617     | 11440.506         | 11550.949   |
| 1891.114    | 22101.473        | 92.449     | 11896.028         | 11819.713   |
| 1963.138    | 17720.256        | 77.956     | 12030.325         | 9769.858    |
| 2005.156    | 13914.157        | 62.629     | 12590.619         | 7401.657    |
| 2077.185    | 16062.022        | 77.002     | 11930.455         | 9512.688    |
| 2122.062    | 13330.304        | 66.012     | 12356.862         | 7788.914    |
| 2167.293    | 5568.540         | 26.729     | 13667.438         | 2832.156    |
| 2191.222    | 9387.085         | 48.640     | 13219.050         | 5172.552    |
| 2237.087    | 4197.435         | 21.110     | 11758.122         | 2594.563    |

| <b>DHB</b> |                  |            |                   |             |
|------------|------------------|------------|-------------------|-------------|
| <b>m/z</b> | <b>Intensity</b> | <b>S/N</b> | <b>Resolution</b> | <b>Area</b> |
| 1896.842   | 29951.482        | 38.246     | 9149.521          | 19804.315   |
| 2010.878   | 24719.168        | 33.628     | 9884.904          | 15817.651   |
| 2121.916   | 119140.219       | 191.075    | 9544.002          | 91663.185   |
| 2236.932   | 20557.604        | 32.878     | 9610.288          | 15465.109   |
| 2257.027   | 20615.116        | 33.528     | 8837.897          | 16766.186   |
| 2372.041   | 20919.756        | 37.221     | 9603.280          | 17045.658   |
| 2377.993   | 17539.128        | 30.688     | 10047.793         | 13658.426   |
| 2970.714   | 8730.050         | 23.613     | 9454.797          | 9222.154    |

**Table S2.** Secondary structure content of the peptide samples derived from the CD spectra (see Fig. S9) using the BeStSel algorithm.<sup>1</sup>

| Peptide | Time (days) | Helix | Antiparallel | Parallel | Turn | Others | RMSD   | NRMSD   |
|---------|-------------|-------|--------------|----------|------|--------|--------|---------|
| GG1     | 0           | 11.4  | 20.4         | 3.0      | 15.8 | 49.4   | 0.0796 | 0.02223 |
|         | 1           | 4.6   | 33.4         | 0.0      | 15.0 | 47.1   | 0.0624 | 0.02858 |
|         | 2           | 12.0  | 16.8         | 5.4      | 15.4 | 50.4   | 0.0805 | 0.02764 |
| GG2     | 0           | 46.6  | 4.1          | 49.3     | 0.0  | 0.0    | 1.9098 | 0.05137 |
|         | 1           | 0.0   | 91.7         | 0.0      | 8.3  | 0.0    | 1.6439 | 0.06553 |
|         | 2           | 0.0   | 89.5         | 0.0      | 10.5 | 0.0    | 1.4763 | 0.06768 |
| BA1     | 0           | 27.5  | 21.6         | 7.3      | 3.7  | 40.0   | 0.3711 | 0.05451 |
|         | 1           | 31.8  | 16.1         | 12.1     | 3.4  | 36.6   | 0.3564 | 0.05296 |
|         | 2           | 24.7  | 26.0         | 10.6     | 0.0  | 38.6   | 1.409  | 0.14956 |
| BB1     | 0           | 11.2  | 30.1         | 2.8      | 4.7  | 51.2   | 0.6059 | 0.06408 |
|         | 1           | 10.2  | 32.0         | 0.0      | 5.2  | 52.6   | 0.5851 | 0.06029 |
|         | 2           | 10.4  | 31.8         | 0.4      | 5.4  | 52.0   | 0.5998 | 0.06125 |
| BB2     | 0           | 2.9   | 30.4         | 0.0      | 17.4 | 49.3   | 0.0710 | 0.01986 |
|         | 1           | 23.6  | 18.7         | 2.0      | 12.3 | 43.4   | 0.1049 | 0.01953 |
|         | 2           | 28.7  | 21.5         | 5.7      | 0.0  | 44.0   | 0.9829 | 0.92820 |

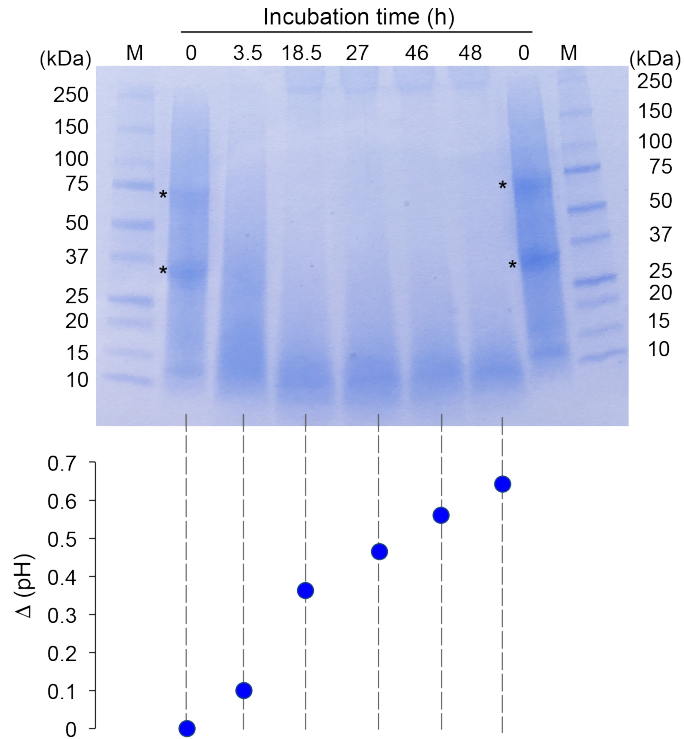

**Figure S1.** Hydrolysis of soy proteins during fibrillation. (Top) SDS-PAGE shows that the proteins in SPI are hydrolyzed upon incubation at 90 °C. In the starting sample (0 h) the glycinin and  $\beta$ -conglycinin subunits are visible at *ca* 35 kDa and *ca* 70 kDa, respectively (indicated by \*). Notably, at longer incubation times, the appearance of high molecular weight bands (> 250 kDa) indicates the formation of supramolecular protein aggregates. (Bottom) Progressive changes in the pH value of the SPI solution provide further support for the hydrolysis process.

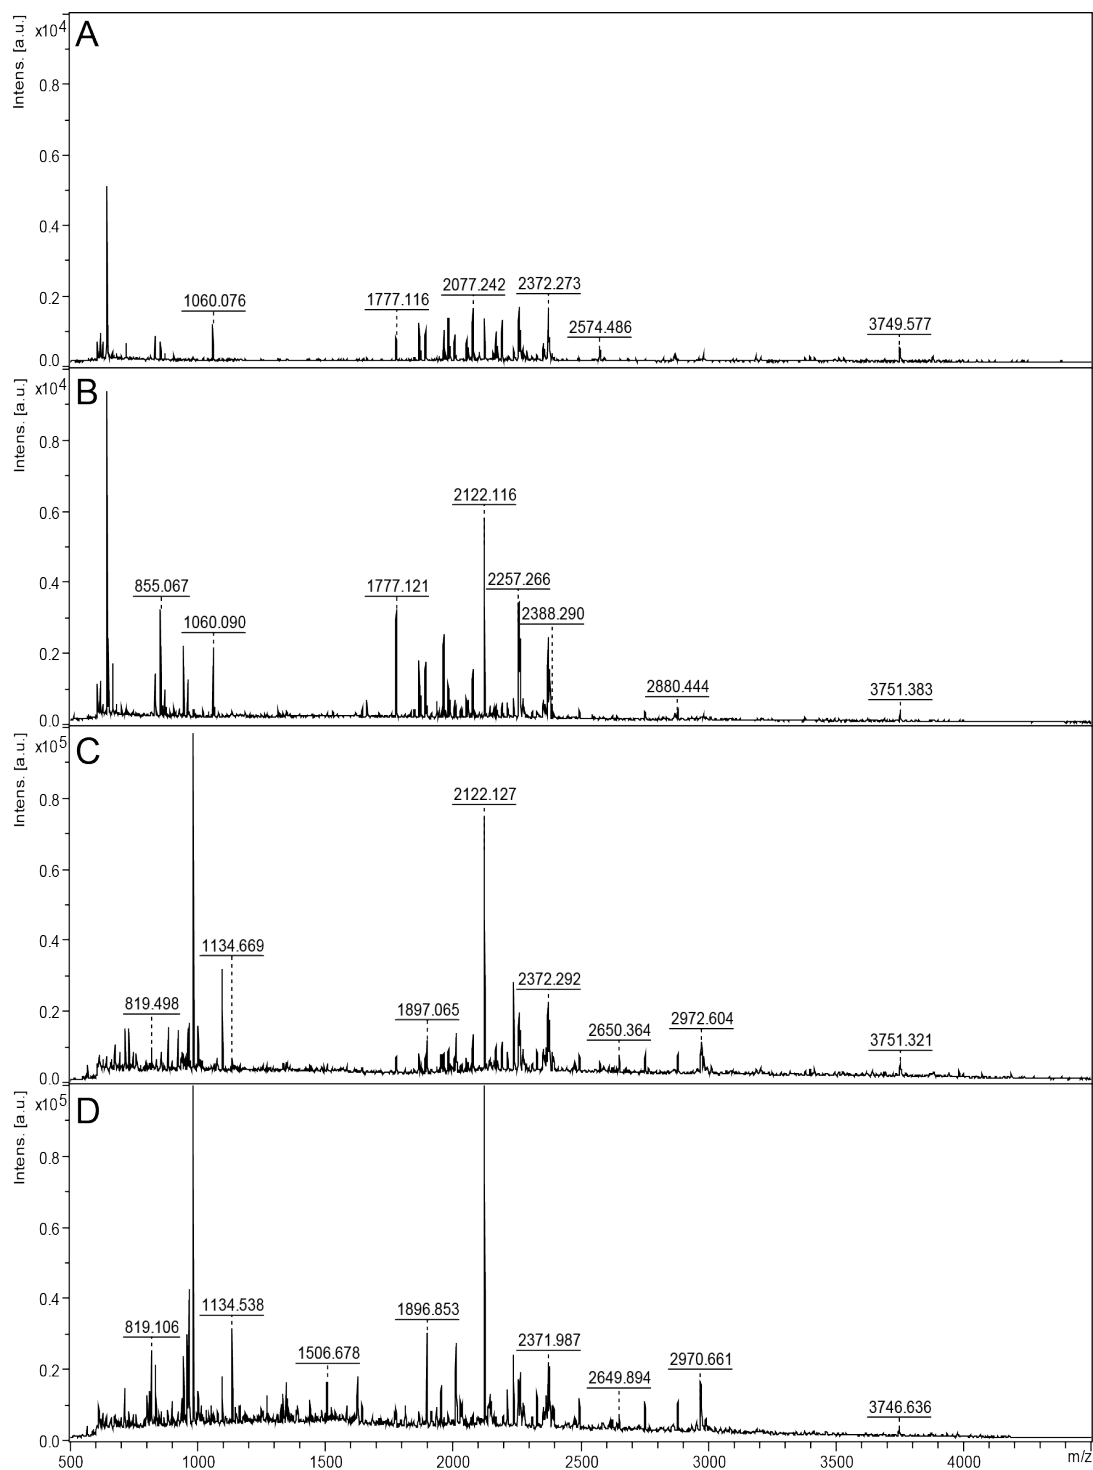

**Figure S2.** Mass spectrum of disaggregated soy PNF samples with different incubation (fibrillation) times and/or different matrices. (A) 3 days with HCCA matrix. (B) 5 days with HCCA matrix. (C) 3 days with DHB matrix. (D) 5 days with DHB matrix. The spectra illustrate the differences between having the sample incubated for 3 days compared to 5 days. The selected parent ions for further MS/MS analysis are listed in Table S1.

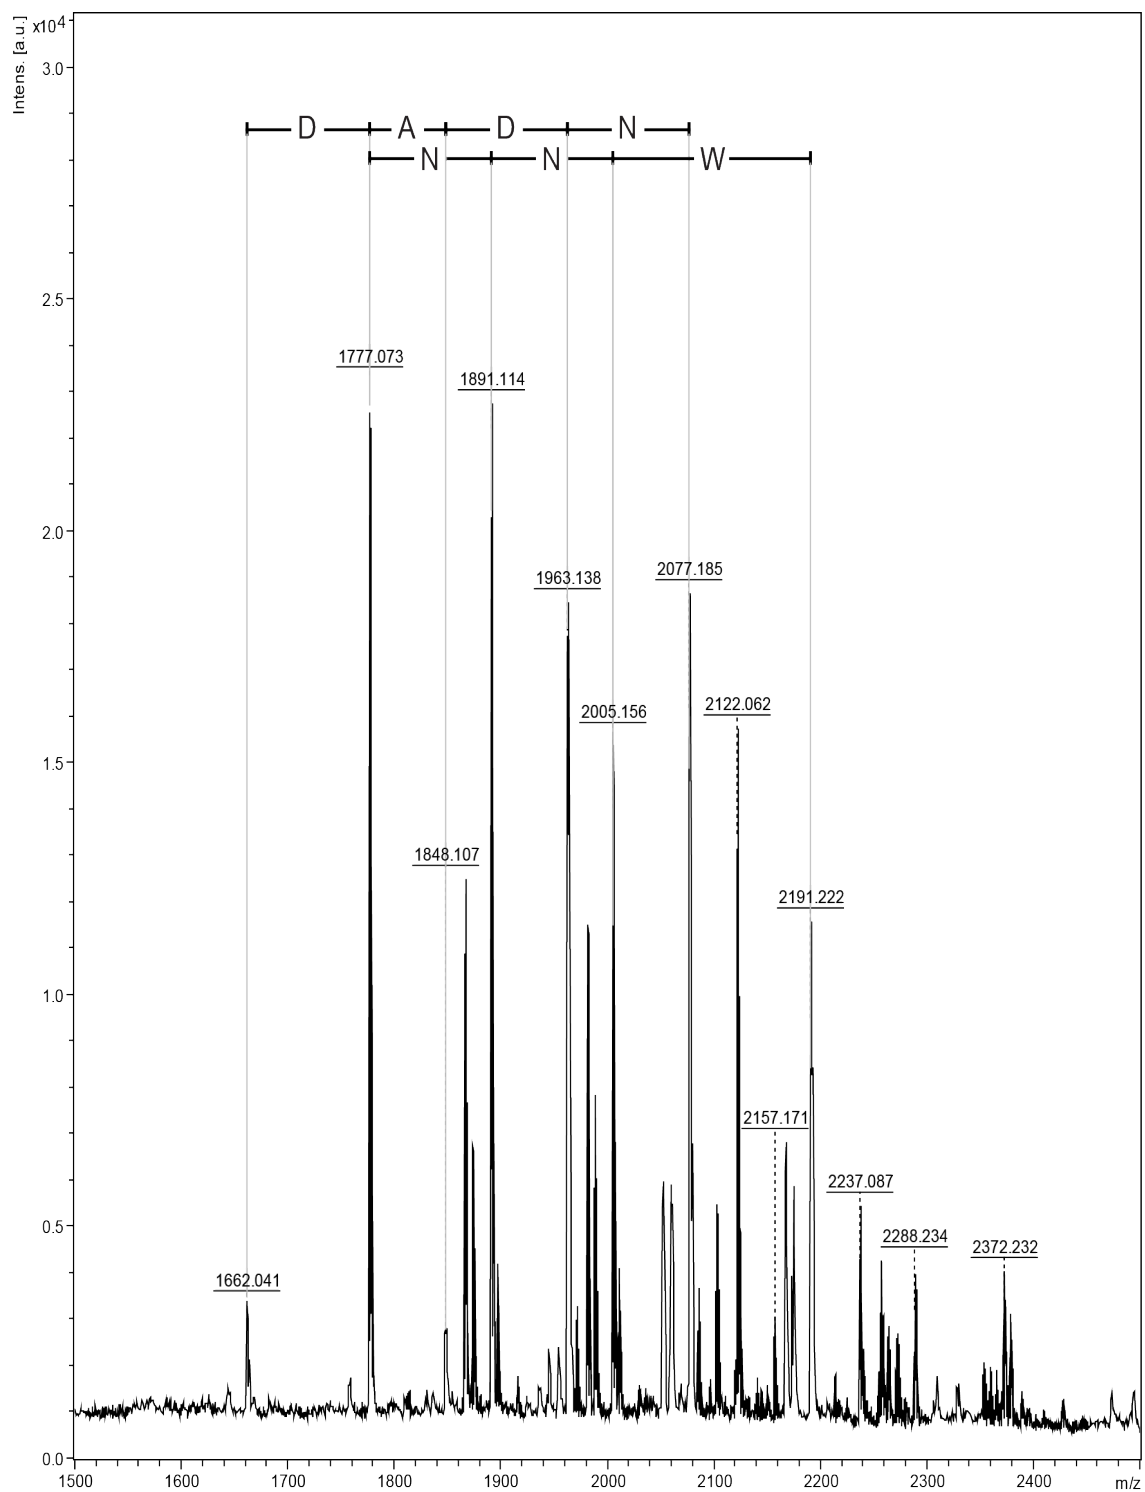

**Figure S3.** Mass spectrum of disaggregated soy PNFs (3 days incubation) with HCCA matrix. The potential amino acid sequences DADN and NNW are indicated.

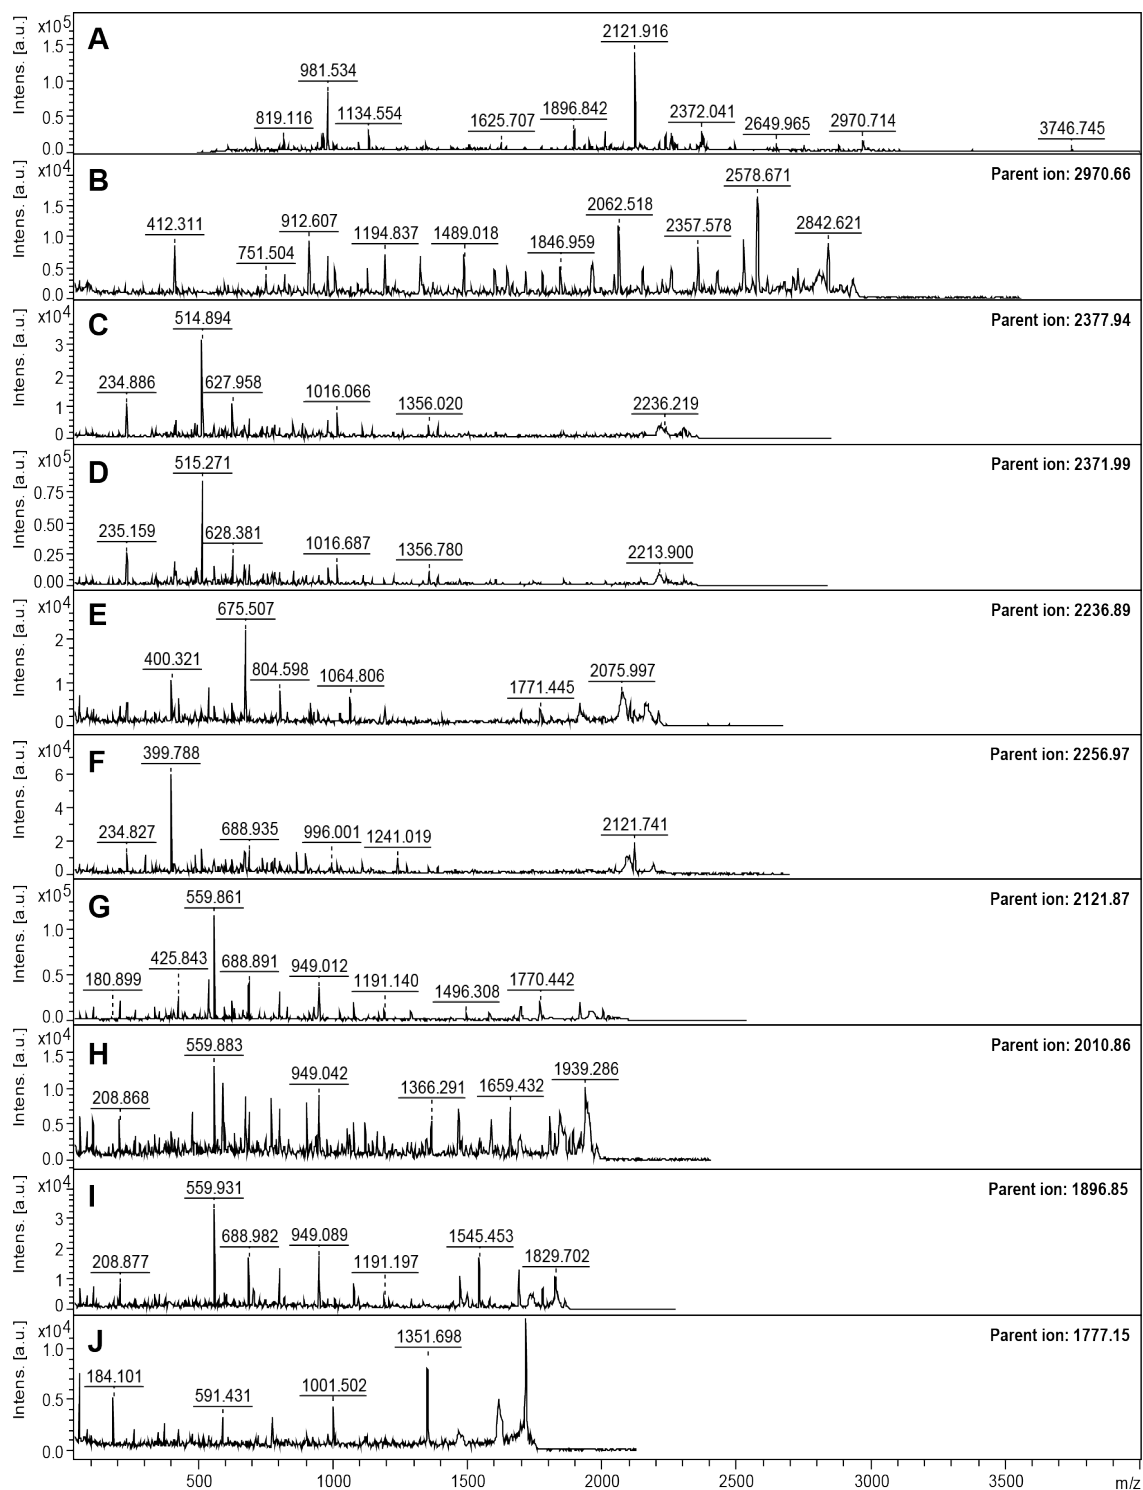

**Figure S4.** Mass spectrum of disaggregated soy PNFs. (A) 5 days incubation and DHB matrix. (B-J) MS/MS analysis of the indicated parent ions.

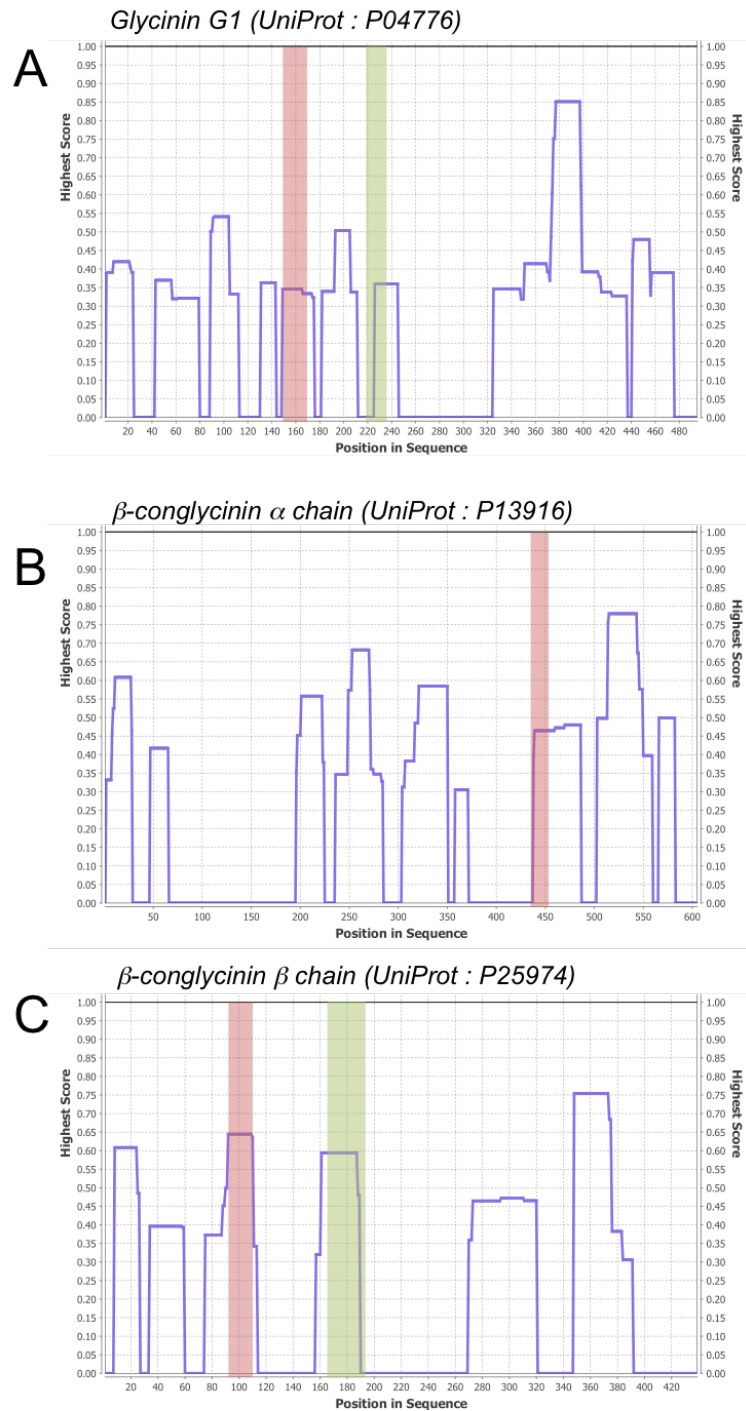

**Figure S5.** Predictions of “ $\beta$ -arch” propensities in glycinin (A) and the  $\alpha$ - and  $\beta$ -chains of  $\beta$ -conglycinin (B and C, respectively) using the software ArchCandy.<sup>2</sup> The regions indicated with red are the PNF-forming segments with native  $\beta$ -structure while the PNF-forming peptides with native helical structure are indicated in green.



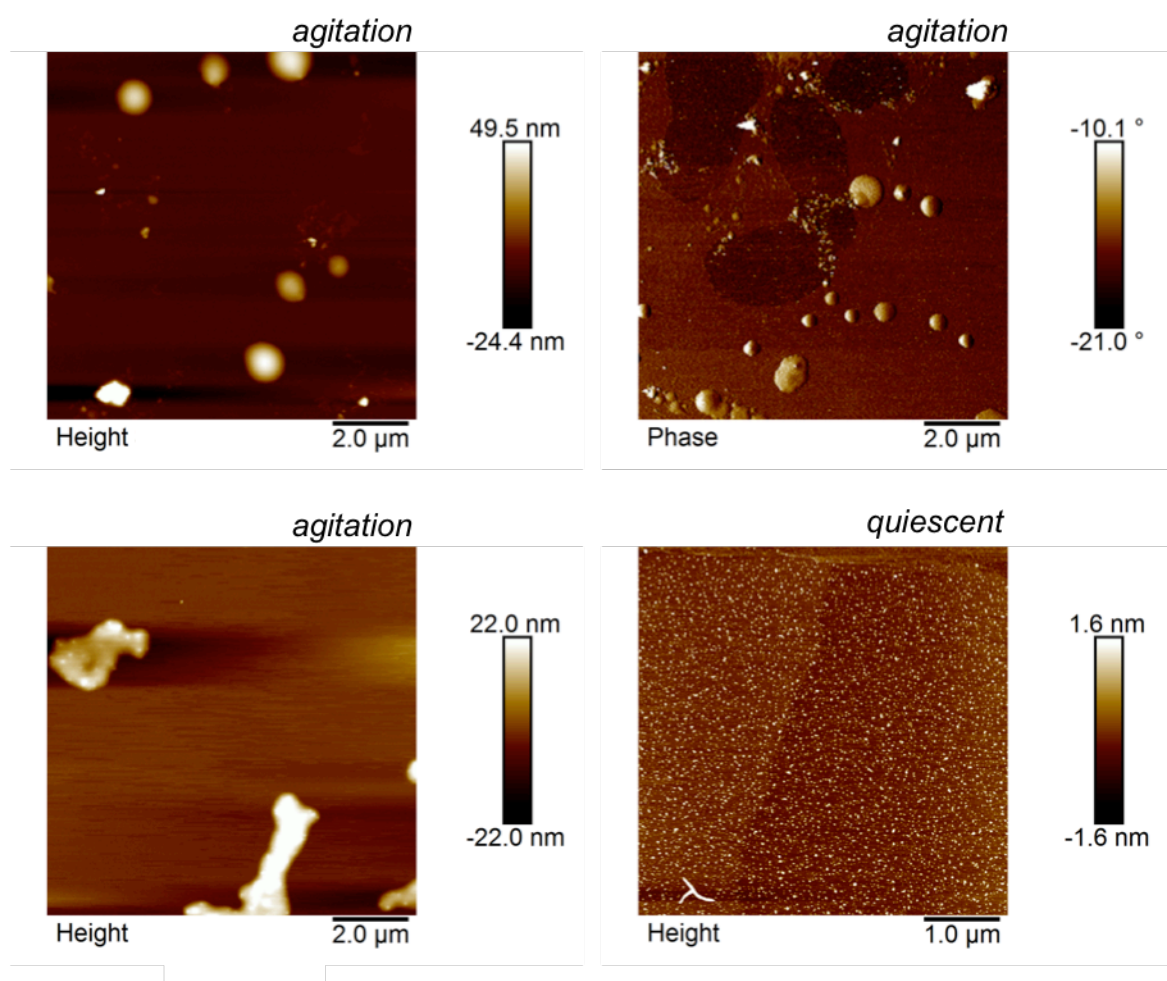

**Figure S6.** AFM images of BB1 peptide samples incubated at 50 °C with or without agitation. The samples mainly contain particulates and large aggregates. Only one fibril-like structure was observed (bottom, right image).

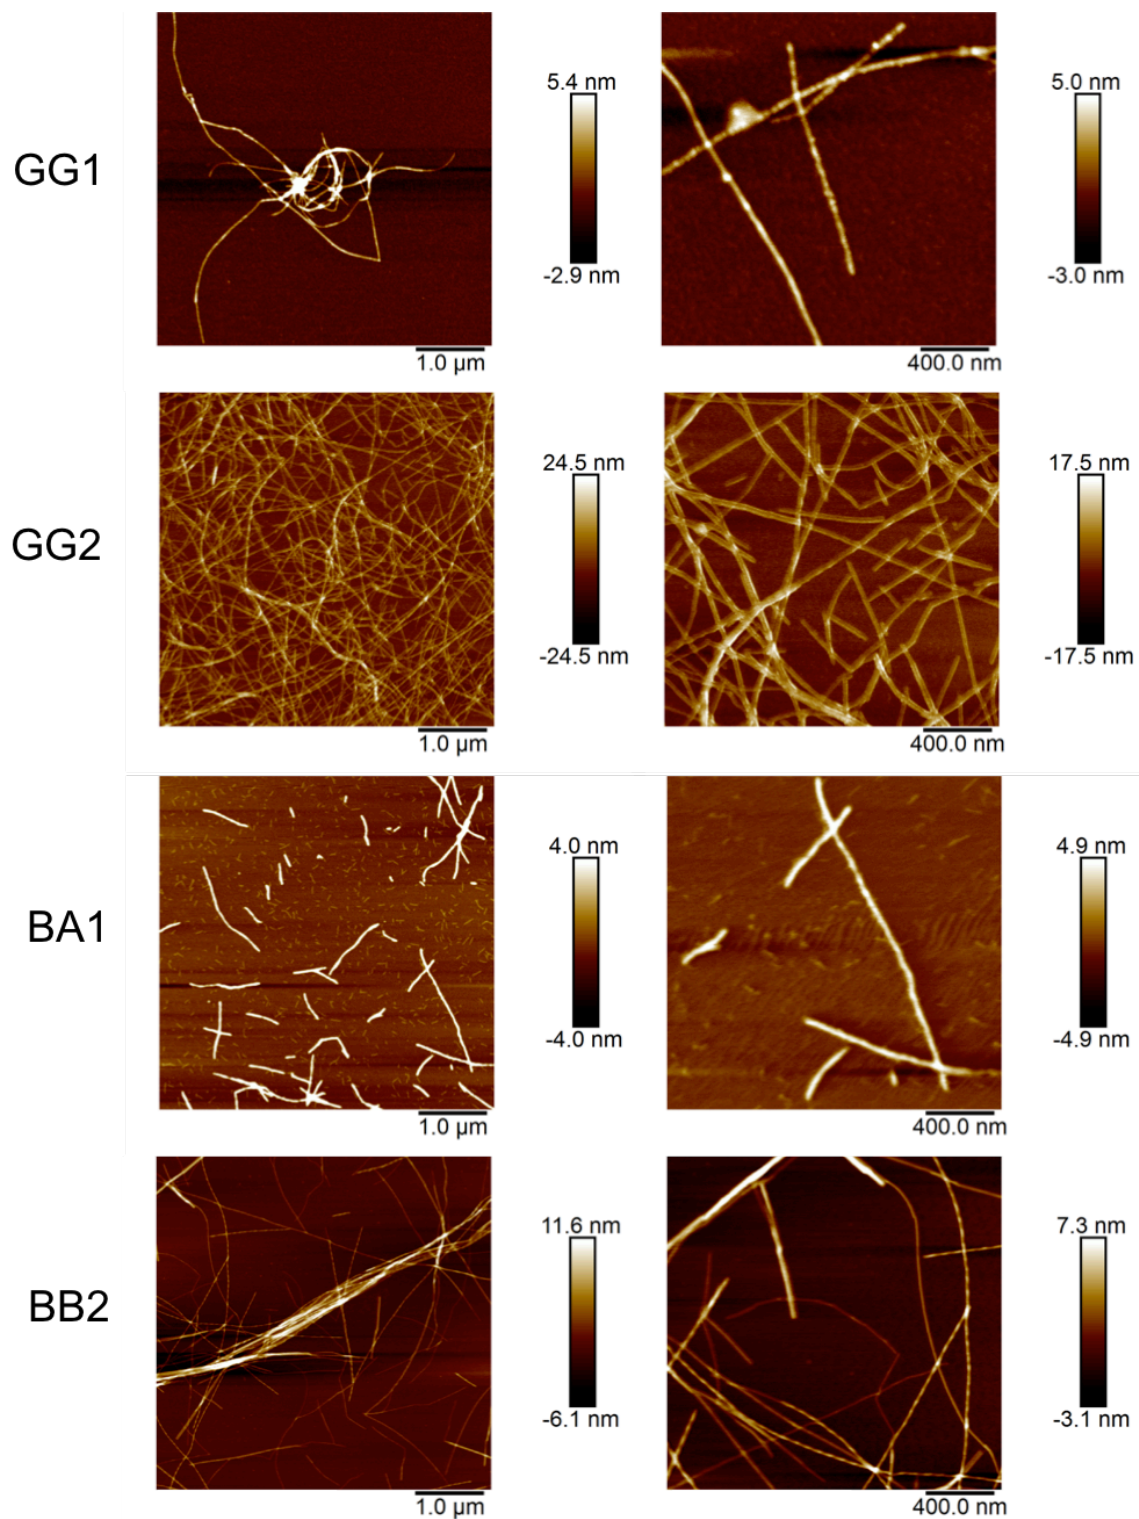

**Figure S7.** AFM images of peptide samples incubated at 50 °C with agitation.

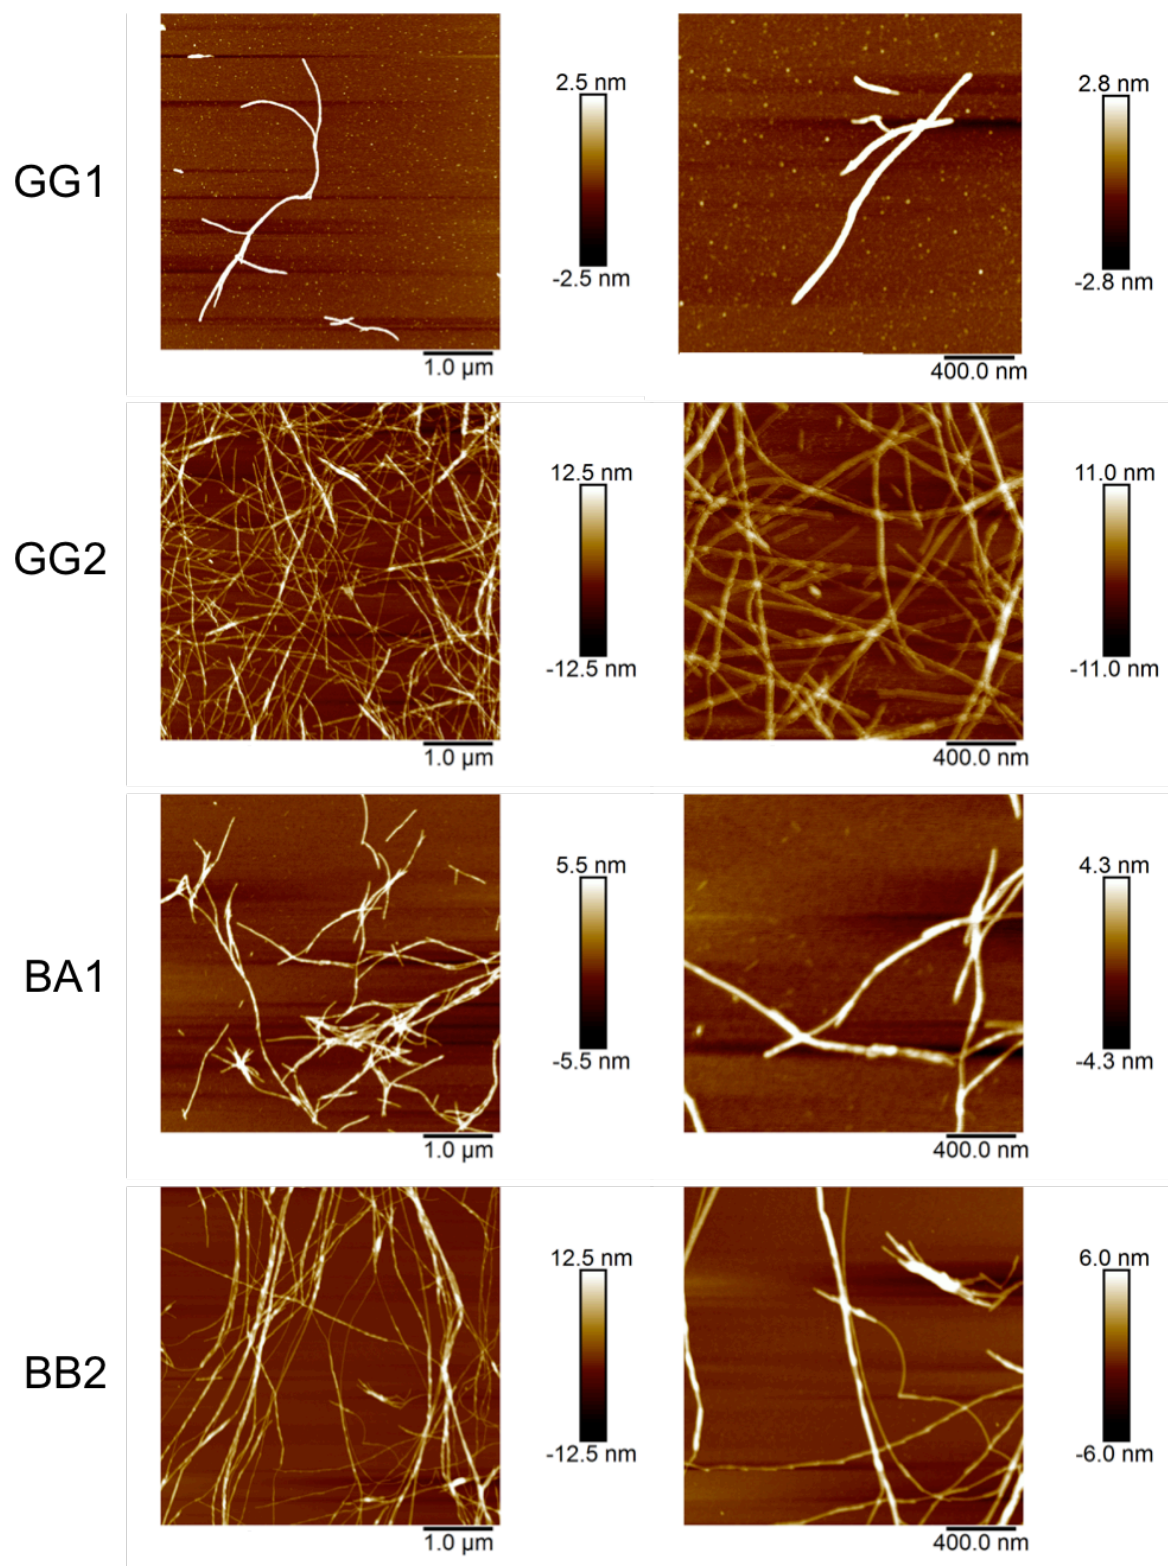

**Figure S8.** AFM images of peptide samples incubated at 50 °C under quiescent conditions.

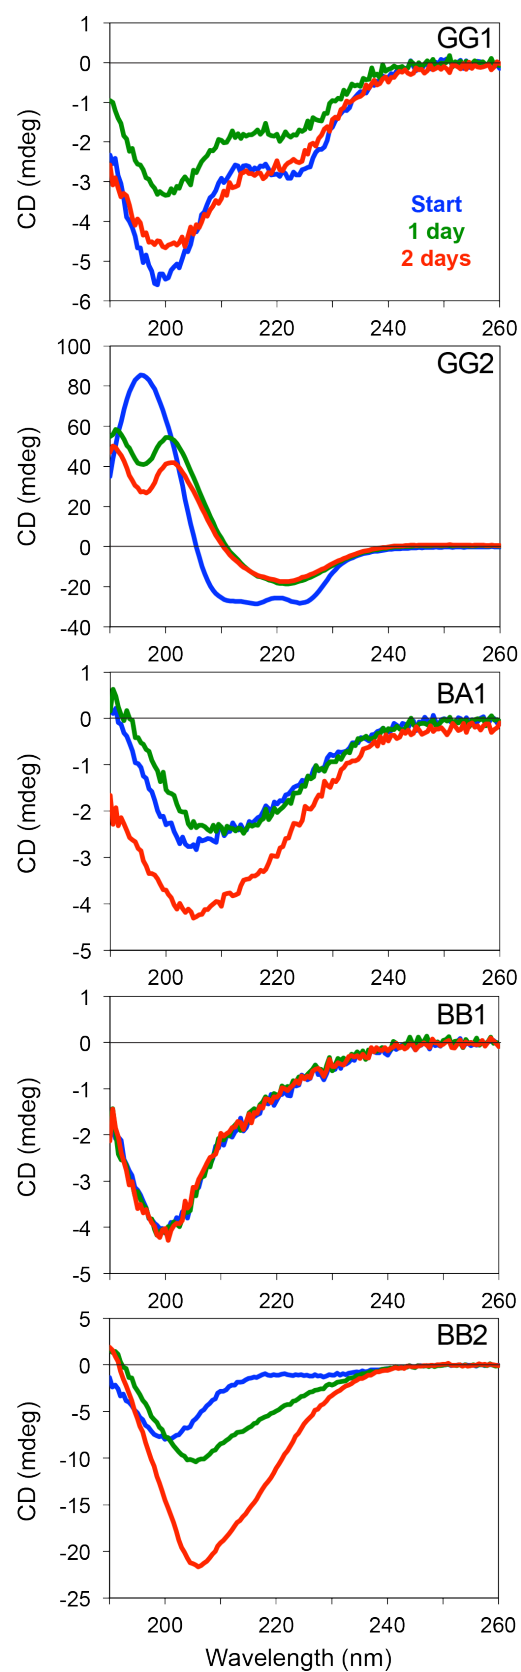

**Figure S9.** CD spectra of peptide samples before (blue) and after incubation at 50 °C with agitation for 1 day (green) or two days (red).

## References

1. A. Micsonai, F. Wien, L. Kernya, Y.-H. Lee, Y. Goto, M. Réfrégiers and J. Kardos, *Proc. Natl. Acad. Sci. U.S.A.* **2015**, 11: E3095-E3103
2. A. B. Ahmed, N. Znassi, M. T. Chateau and A. V. Kajava, *Alzheimers Dement.* **2015**, 11, 681-690.
